# Supplementary material for: Periodic mesoporous organosilica with Serine-Tryptophan dipeptide framework by encapsulating curcumin to enhance ultraviolet shielding
Source: Research Square preprint supplement (doi:10.21203/rs.3.rs-6319997/v1), 2025-04-21
Supplement: Supplementary file 1 [file 88fc7a197355d57c4da1a9d6.docx]

**Supplementary material**

**Periodic mesoporous organosilica with Serine-Tryptophan dipeptide framework by encapsulating curcumin to enhance ultraviolet shielding**

*Hengchang He*‡*, Huapei Peng* ‡*, Fangyuan Liu, Xiuwen Zhu, Chi Qu, Cheng Guo and Jianqiang Wang**

School of Chemistry and Molecular Engineering, Nanjing Tech University, 30 Puzhu South Road, Jiangsu, Nanjing, 211816, China, E-mail: [jqwang@njtech.edu.cn](mailto:jqwang@njtech.edu.cn)

‡ These authors contributed equally to this work and should be considered co-first authors.

**Characterization of Serine-Tryptophan dipeptide bilateral organic silane precursor（Ser-Trp-BOSP）**

1H NMR (400 MHz, DMSO-*d6*) δ 10.94-10.90 (m, 2H), 10.00-9.42 (m, 1H), 8.24-7.95 (m, 1H), 7.32 (dd, *J* = 13.2, 6.8 Hz, 2H), 7.09-6.88 (m, 3H), 6.34-5.91 (m, 3H), 4.84 (t, *J* = 5.3 Hz, 3H), 4.09 (dt, *J* = 8.2, 5.4 Hz, 2H), 3.83-3.70 (m, 9H), 3.58-3.46 (m, 3H), 3.19-2.92 (m, 6H), 1.58-1.41 (m, 4H), 1.23-1.11 (m, 18H), 0.63-0.51 (m, 4H). (Figure S1)

FTIR (KBr, cm-1)：3340.01, 2973.35, 2930.55, 2854.91, 1624.31.95, 1572.06, 1443.09, 1392.60, 1248.51, 1102.97, 1077. 05. (Figure S2)

HR-MS(M+H+)：calculated for 800.4046, found 800.4046 (Figure S3)


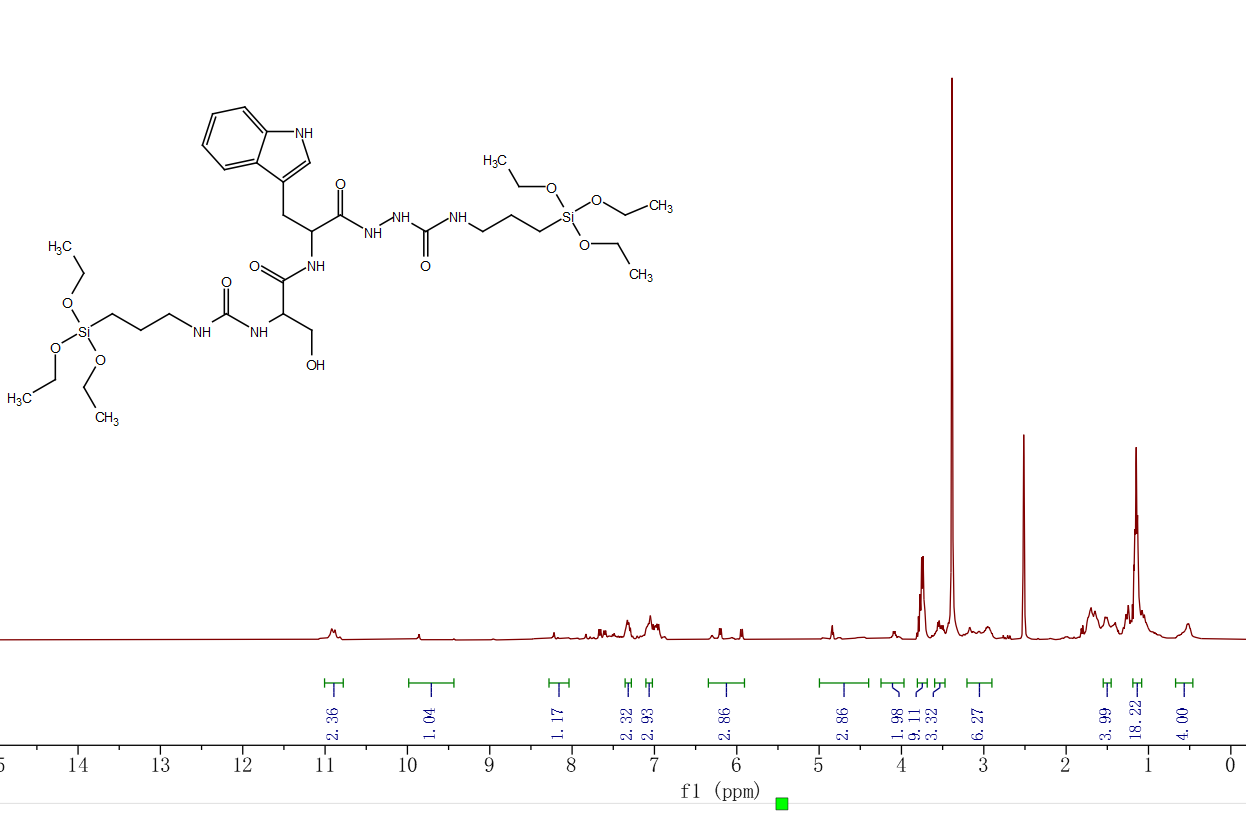


**Figure S1.** 1H NMR of Serine-Tryptophan dipeptide bilateral organic silane precurso**r**


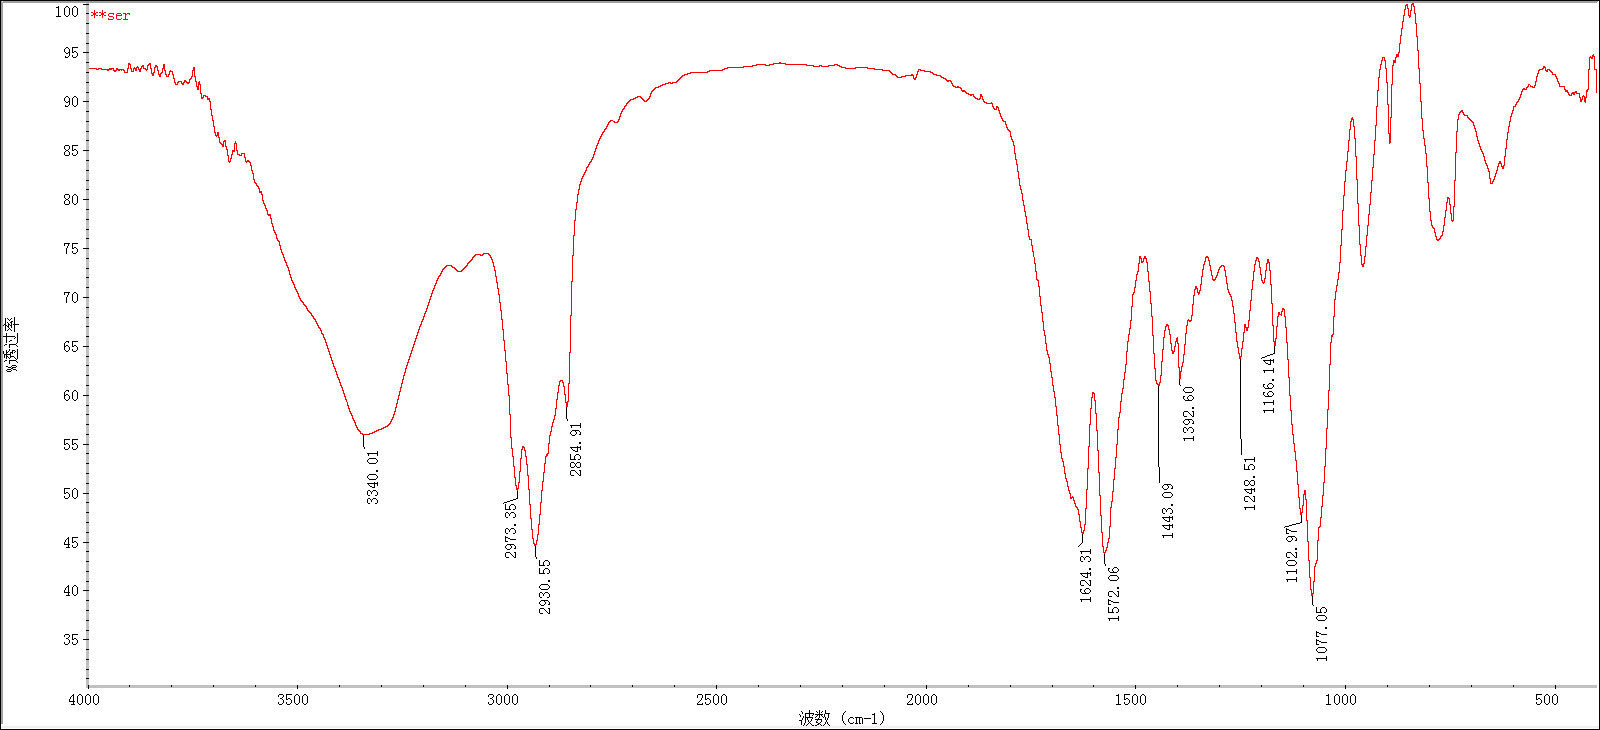


**Figure S2.** FTIR spectra of Serine-Tryptophan dipeptide bilateral organic silane precursor

**Figure S3.** HR-MS of Serine-Tryptophan dipeptide bilateral organic silane precursor

**Tryptophan bilateral organic silane precursor**

The preparation of tryptophan [organosilicon](https://www.sciencedirect.com/topics/chemistry/organosilicon) precursor was shown in Scheme S1. First, 40 mmol (8.17 g) of tryptophan and 100 mL of methanol were successively added into the triple-necked flask with the magnetic stirring, and the system was maintained at 0 °C under ice bath conditions. Meanwhile, 9 mL of dichlorosulfoxide was slowly added dropwise into the above system. Subsequently, they were heated and refluxed in an oil bath for 5 hours. After that, they were cooled and evaporated under reduced pressure to obtain crude products. Then, they were redispersed into methanol solution, and evaporated under reduced pressure to remove the methanol, thereby produce 8.35g tryptophan methyl ester hydrochloride in yield of 82%. Second, 10 mmol (2.91 g) of tryptophan methyl ester hydrochloride and 50 mL of anhydrous ethanol were mixed in a 250 mL three-necked flask. 3.13 g of 80% hydrazine hydrate was added to the reaction system under the protection of nitrogen. The reaction system was heated and refluxed in an oil bath overnight. After cooling, the hydrazine hydrate was removed by filtration, and the methanol was removed by spinning under reduced pressure. The mixed solvents of 60 mL dichloromethane and 20 mL isopropanol were added to dissolve the residuum, and 40 mL saturated saline was used to extract the solution. The organic layer was separated and collected. The solvent was then removed via rotary evaporation under reduced pressure, yielding the crude product as a brown oily substance of tryptophyl hydrazide. Finally, 2.18 g tryptophyl hydrazide was dissolved in 100 mL anhydrous tetrahydrofuran under nitrogen atmosphere. 3-isocyanato-propyltriethoxysilane (IPTES, 20 mmol, 4.95 g) was slowly added dropwise to the solution. The reaction mixture was stirred at room temperature for 2 hours. Then, the solvent was removed under reduced pressure using a rotary evaporator, affording a white solid product of 3.07 g in 55% yield. The obtained product was confirmed by [1H NMR](https://www.sciencedirect.com/topics/chemistry/1h-nmr-spectroscopy) , [FTIR](https://www.sciencedirect.com/topics/materials-science/fourier-transform-infrared-spectroscopy) analysis.


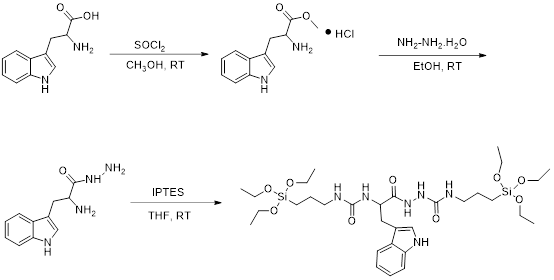


**Scheme S1.** Synthesis of tryptophan bilateral organic silane precursor

1H NMR (400MHz, DMSO-*d6*, TMS): δ 11.01-10.80 (m, 1H), 9.82 (s, 1H), 7.74 (s, 1H), 7.58 (d, *J* = 7.9 Hz, 1H), 7.33 (d, *J* = 8.1 Hz, 1H), 7.19 (d, *J* = 2.3 Hz, 1H), 7.07 (t, *J* = 7.5 Hz, 1H), 6.99 (t, *J* = 7.4 Hz, 1H), 6.42–5.97 (m, 3H), 4.32 (q, *J* = 6.7 Hz, 1H), 3.73 (qd, *J* = 7.0, 4.2 Hz, 12H), 3.07-2.85 (m, 6H), 1.39 (td, *J* = 12.5, 6.3 Hz, 4H), 1.14 (td, *J* = 7.0, 4.4 Hz, 18H), 0.54-0.40 (m, 4H). (Figure S4)

FTIR (KBr, cm-1): 3315, 2974, 2926, 1658, 1614, 1572, 1481, 1459, 1390, 1280, 1195, 1166, 1103, 1080, 956, 785. (Figure S5)

**
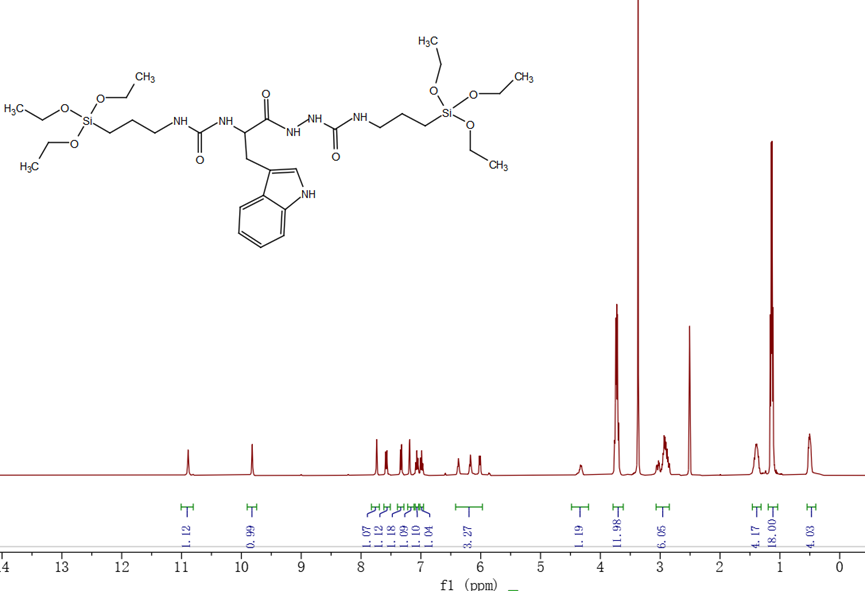
**

**Figure S4.** 1H NMR of tryptophan bilateral organic silane precursor

**Figure S5.** FTIR spectra of tryptophan bilateral organic silane precursor

**Serine bilateral organic silane precursor**

The preparation route of [serine](https://www.sciencedirect.com/topics/chemistry/serine) [organosilicon](https://www.sciencedirect.com/topics/chemistry/organosilicon) precursor was prepared according to our previous report (Microporous and Mesoporous Materials, 373 (2024) 113133), as shown in [Scheme S2](https://www.sciencedirect.com/science/article/pii/S1387181124001550?via%3Dihub" \l "sch1). The reaction conditions, steps and purification methods were carried out in accordance with the literature protocol. Moreover, the obtained compound serine bilateral organic silane precursor was characterized by spectroscopic analysis, and the spectral data showed in full agreement with those reported in our previous literature.

**Scheme S2.** Synthesis of serine bilateral organic silane precursor

**Standard curve of Curcumin**

**Figure S6.** Standard curve of Curcumin
